# Supplementary material for: Loss of foxo rescues stem cell aging in Drosophila germ line
Source: eLife journal article supplement (doi:10.7554/elife.27842), 2017-09-18
Supplement: supp [file elife_poa_e27842_Source_Data_1.xlsx]

## Sheet: w1118 data
Young w[1118]
GSC spectrosome shape	Unirr.		1 day post IR		2 days post IR		3 days post IR		4 days post IR			Branched fusomes	Unirr.		1 day post IR		2 days post IR		3 days post IR		4 days post IR
w[1118]	Round	Elongated	Round	Elongated	Round	Elongated	Round	Elongated	Round	Elongated		w[1118]	≥ 1 branched fusomes	No branched fusomes	≥ 1 branched fusomes	No branched fusomes	≥ 1 branched fusomes	No branched fusomes	≥ 1 branched fusomes	No branched fusomes	≥ 1 branched fusomes	No branched fusomes
Exp. 1	59	15	54	2	103	32	51	24	42	12		Exp. 1	31	4	7	22	9	74	17	28	28	2
Exp. 2	164	40	221	4	97	45	///////////	/////////////	98	22		Exp. 2	60	0	9	26	21	39	48	10	57	6
Exp. 3	97	17	134	3	137	23	84	20	52	10		Exp. 3	53	0	0	76	1	103	52	11	25	7
Total	320	72	409	9	337	100	135	44	192	44		Total	144	4	16	124	31	216	117	49	110	15
Mean	106.667	24	136.333	3	112.333	33.3333	67.5	22	64	14.6667		Mean	48	1.33333	5.33333	41.3333	10.3333	72	39	16.3333	36.6667	5
Aging w[1118]
GSC number	Unirr				7 D
4wk-old	0	1	2	3	0	1	2	3
Sample
2.0 2/2	0	5	25	0	0	15	21
3.0 2/2	0	1	26	0	2	9	19
6.0 2/16	2	7	9	0
8.0 3/8
	-	11	25		3	11	13
SUM	2	24	85	0	5	35	53	0
%	1.8018	21.6216	76.5766	0	5.37634	37.6344	56.9892	0
GSC number
6wk-old	Unirr				7 D
	0	1	2	3	0	1	2	3
Sample
1/3/4 2/16	2	17	23		11	7	13
17	0	1	3		5	10	16
	0	6	17
14	1	20	25		8	5	17
SUM	3	44	68	0	24	22	46	0
%	2.6087	38.2609	59.1304	0	26.087	23.913	50	0
GSC elongation
4wk-old	Unirr				7 D
	Elongated	Non			Elongated	Non
Sample
	6	32			1	26
	9	27			9	32
	11	33			11	29
SUM	26	92	0	0	21	87	0	0
%	22.0339	77.9661	0	0	19.4444	80.5556	0	0
GSC elongation
6wk-old	Unirr				7 D
	Elongated	Non			Elongated	Non
Sample	3	19			3	27
	6	24			7	38
	3	17			2	19
SUM	12	60	0	0	12	84	0	0
%	16.6667	83.3333	0	0	12.5	87.5	0	0
Branched Fusomes
4wk-old
	Unirr		7 D
	<4	>4	<4	>4
Sample
			9	39
unknown	4	27
13	3	31	12	41
SUM	4	27	12	41
%	12.9032	87.0968	22.6415	77.3585
Branched Fusomes
6wk-old
	t=0		t=7D
	<4	>4	<4	>4
Sample	4	29	35	11
17	1	3
2	2	15
14			26	6
SUM	3	18	26	6
%	14.2857	85.7143	81.25	18.75

## Sheet: DNA damage
Young w1118
	Unirr				30 mins				12 hours				1 Day				2 Days
	High	Med	Low		High	Med	Low		High	Med	Low		High	Med	Low		High	Med	Low
Exp. 1	3	12	68		57	2	0		9	97	11		0	13	25		5	10	87
Exp. 2					126	10	0		2	39	4
6wk-old w1118
	Unirr				30 mins				1 Day
	High	Med	Low		High	Med	Low		High	Med	Low
Exp. 1	0	5	40		27	14	0		0	2	28
Exp. 2	0	7	34		24	9	0		0	8	27

## Sheet: RNAi data (young flies)
RNAi data (young flies)
GSC spectrosome shape	Unirr.		1 day post IR		2 days post IR			Branched fusomes	Unirr.		1 day post IR		2 days post IR
Gal4>Foxo RNAi (BL 32993)	Round	Elongated	Round	Elongated	Round	Elongated		Gal4>Foxo RNAi (BL 32993)	≥ 1 branched fusomes	No branched fusomes	≥ 1 branched fusomes	No branched fusomes	≥ 1 branched fusomes	No branched fusomes
Exp. 1	54	12	82	9	72	11		Exp. 1	34	0	43	6	6	46
Exp. 2	48	8	67	10	91	16		Exp. 2	24	0	29	10	23	47
Exp. 3	74	13	86	10	102	11		Exp. 3	43	1	50	3	13	48
Total	176	33	235	29	265	38		Total	101	1	122	19	42	141
Mean	58.6667	11	78.3333	9.66667	88.3333	12.6667		Mean	33.6667	0.333333	40.6667	6.33333	14	47
GSC spectrosome shape	Unirr.		1 day post IR		2 days post IR			Branched fusomes	Unirr.		1 day post IR		2 days post IR
Gal4>Tor RNAi (BL 35578)	Round	Elongated	Round	Elongated	Round	Elongated		Gal4>Tor RNAi (BL 35578)	≥ 1 branched fusomes	No branched fusomes	≥ 1 branched fusomes	No branched fusomes	≥ 1 branched fusomes	No branched fusomes
Exp. 1	130	24	58	1	110	6		Exp. 1	81	0	2	38	5	73
Exp. 2	54	6	70	0	36	0		Exp. 2	0	43	6	39	0	32
Exp. 3	40	2	////////////	////////////	42	0		Exp. 3	2	29	////////////////////////	///////////////////////	0	31
Total	224	32	128	1	188	6		Total	83	72	8	77	5	136
Mean	74.6667	10.6667	64	0.5	62.6667	2		Mean	27.6667	24	4	38.5	1.66667	45.3333
GSC spectrosome shape	Unirr.		1 day post IR		2 days post IR			Branched fusomes	Unirr.		1 day post IR		2 days post IR
Gal4 control (BL 25751)	Round	Elongated	Round	Elongated	Round	Elongated		Gal4 control (BL 25751)	≥ 1 branched fusomes	No branched fusomes	≥ 1 branched fusomes	No branched fusomes	≥ 1 branched fusomes	No branched fusomes
Exp. 1	56	15	51	2	49	6		Exp. 1	37	0	3	27	0	37
Exp. 2	40	17	49	2	60	9		Exp. 2	27	0	8	19	2	40
Exp. 3	65	24	43	1	65	14		Exp. 3	46	1	3	21	5	44
Total	161	56	143	5	174	29		Total	110	1	14	67	7	121
Mean	53.6667	18.6667	47.6667	1.66667	58	9.66667		Mean	36.6667	0.333333	4.66667	22.3333	2.33333	40.3333
GSC spectrosome shape	Unirr.		1 day post IR		2 days post IR			Branched fusomes	Unirr.		1 day post IR		2 days post IR
Gal4>Thor RNAi (BL 36815)	Round	Elongated	Round	Elongated	Round	Elongated		Gal4>Thor RNAi (BL 36815)	≥ 1 branched fusomes	No branched fusomes	≥ 1 branched fusomes	No branched fusomes	≥ 1 branched fusomes	No branched fusomes
Exp. 1	102	21	76	3	56	9		Exp. 1	62	0	13	28	3	35
GSC spectrosome shape	Unirr.		1 day post IR		2 days post IR			Branched fusomes	Unirr.		1 day post IR		2 days post IR
Gal4>Foxo RNAi (BL 32427)	Round	Elongated	Round	Elongated	Round	Elongated		Gal4>Foxo RNAi (BL 32427)	≥ 1 branched fusomes	No branched fusomes	≥ 1 branched fusomes	No branched fusomes	≥ 1 branched fusomes	No branched fusomes
Exp. 1	40	7	97	13	/////////////	/////////////		Exp. 1	23	0	36	17	////////////////////////	////////////////////////
GSC spectrosome shape	Unirr.		1 day post IR		2 days post IR			Branched fusomes	Unirr.		1 day post IR		2 days post IR
Gal4>Loki RNAi (BL 64482)	Round	Elongated	Round	Elongated	Round	Elongated		Gal4>Loki RNAi (BL 64482)	≥ 1 branched fusomes	No branched fusomes	≥ 1 branched fusomes	No branched fusomes	≥ 1 branched fusomes	No branched fusomes
Exp. 1	38	5	53	19	/////////////	/////////////		Exp. 1	20	1	24	7	////////////////////////	////////////////////////
GSC spectrosome shape	Unirr.		1 day post IR		2 days post IR			Branched fusomes	Unirr.		1 day post IR		2 days post IR
Gal4>Dacapo RNAi (BL 36720)	Round	Elongated	Round	Elongated	Round	Elongated		Gal4>Dacapo RNAi (BL 36720)	≥ 1 branched fusomes	No branched fusomes	≥ 1 branched fusomes	No branched fusomes	≥ 1 branched fusomes	No branched fusomes
Exp. 1	62	11	99	7	63	13		Exp. 1	38	0	54	8	20	25
GSC spectrosome shape	Unirr.		1 day post IR		2 days post IR			Branched fusomes	Unirr.		1 day post IR		2 days post IR
Foxo RNAi (BL 32993) No Gal4	Round	Elongated	Round	Elongated	Round	Elongated		Foxo RNAi (BL 32993) No Gal4	≥ 1 branched fusomes	No branched fusomes	≥ 1 branched fusomes	No branched fusomes	≥ 1 branched fusomes	No branched fusomes
Exp. 1	77	23	94	2	66	12		Exp. 1	36	0	31	5	15	21
Exp. 2	73	25	83	3	68	11		Exp. 2	34	0	30	4	16	18

## Sheet: RNAi data (aging)
6wk-old Gal4>Foxo RNAi (BL 32993)
GSC number
t=0				t=7d
0	1	2	3	0	1	2	3
1	7	19		10	19	25
5	11	21		7	21	28
3	15	25		5	24	28
9	33	65	0	22	64	81	0
8.41121	30.8411	60.7477	0	13.1737	38.3234	48.503	0
Branched Fusomes
t=0		t=7d
<4	>4	<4	>4
6	21	9	24
9	25	8	31
7	26	4	26
22	72	21	81
11.2245	0.765957	20.5882	0.765957

## Sheet: Rapamycin data
Rapamycin data
GSC spectrosome shape	Rapamycin (200μM) 2 days post IR		DMSO 2 days post IR		Rapamycin (200μM) NO IR		DMSO NO IR
w[1118]	Round	Elongated	Round	Elongated	Round	Elongated	Round	Elongated
Exp. 1	96	1	70	7	31	4	30	12
Exp. 2	61	1	78	9	57	4	80	19
Exp. 3	83	0	71	6	65	8	///////////////	////////////////////
Total	240	2	219	22	153	16	110	31
Mean	80	0.666667	73	7.33333	51	5.33333	55	15.5

## Sheet: p-S6 levels
6wk-old w1118		6wk-old Gal4>Foxo RNAi (BL 32993)
Average p-S6 intensity		Average p-S6 intensity
7.711		44.6771
10.931		22.9454
9.332		35.5842
10.553		27.9443
9.368		40.422
8.839		23.0415
8.756		24.305
7.887		26.5144
		36.0353
		26.7662
		20.93

## Sheet: Double IR
Gal4 control (BL 25751)						Gal4>Foxo RNAi (BL 32427)
# GSCs 1D post 2nd pulse						# GSCs 1D post 2nd pulse
	0 GSC	1 GSC	2GSC	3 GSC			0 GSC	1 GSC	2GSC	3 GSC
Exp. 1	0	11	20	3		Exp. 1	9	17	13	1
Exp.2	11	14	23	1		Exp.2	20	29	11	2
Exp. 3	15	21	21	4		Exp. 3	27	18	15	0
Total	26	46	64	8		Total	56	64	39	3
Mean	8.66667	15.3333	21.3333	2.66667		Mean	18.6667	21.3333	13	1
